# Supplementary material
Source: PubMed Central journal article supplement (PMC3412169)
Supplement: NIHMS201998-supplement-2.pdf [file NIHMS201998-supplement-2.pdf]

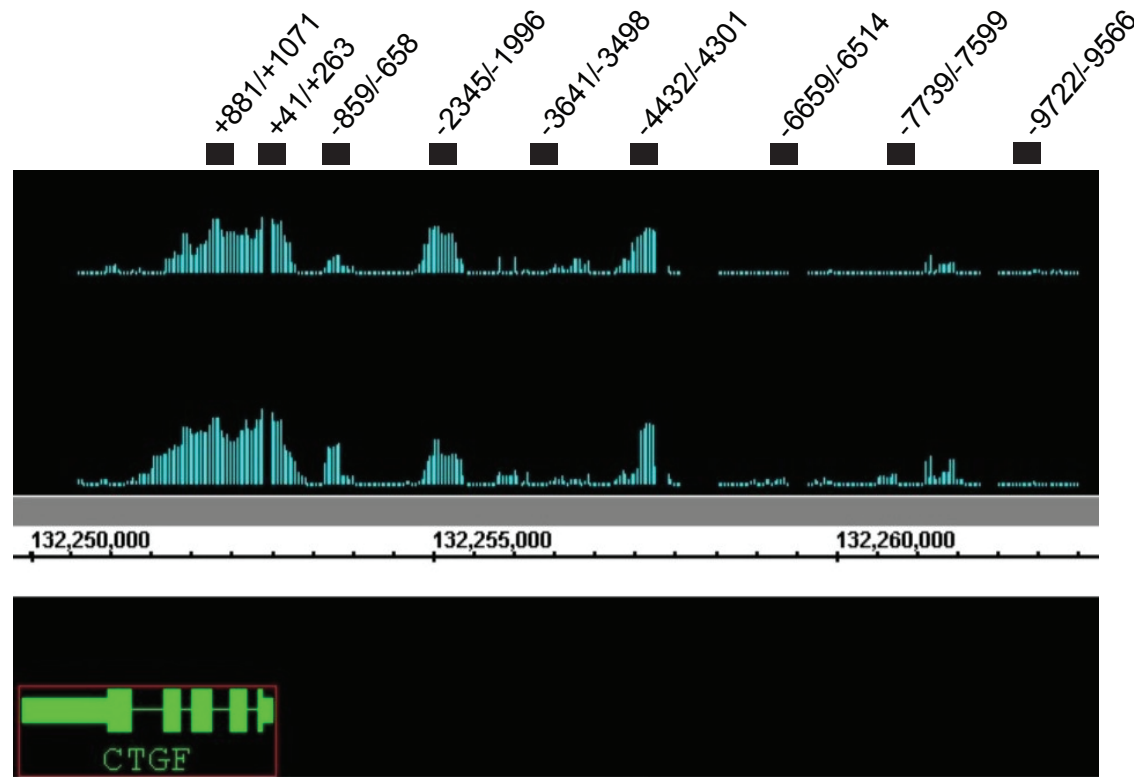

Supplementary Figure 2. Image from Integrated Genome Browser (Affymetrix) displays two experimental MUC1.CT versus IgG ChIP-chip replicates where blue lines represent individual oligonucleotide probes whose height represents degree of enrichment. Oligonucleotide primer pairs used to confirm MUC1.CT occupancy are represented by black bars and their sequences are reported in Table 2.

**Table 2. Oligonucleotide sequences for chromatin immunoprecipitation of CTGF regulatory regions**

| Primer Pair | Forward               | Reverse                | Location on Chr 6   |
|-------------|-----------------------|------------------------|---------------------|
| +881/+1071  | CAACCACGGTTTGGTCCTTG  | CGGAGAGTCCTTCCAGAGCA   | 132252017-132252207 |
| +41/+263    | AGAGGGCGAGGAGGACCAC   | AGTGCGACTCCACCCTCCA    | 132252825-132253047 |
| -859/-658   | TTCCTGGGGCAGATTCCA    | AACCCCTTGCATCCAGT      | 132253746-132253947 |
| -2345/-1996 | GGGGAAGGGTAGGGATGTGC  | TCAGCCCTCACTGAACCCTATT | 132255084-132255433 |
| -3641/-3498 | GGGAAACATGCCGGAGGAAT  | CTCCCCCTGACCCACCATAA   | 132256586-132256729 |
| -4432/-4301 | CAGCCCTTGCTTCATCAGG   | ATTGGGTGCCCCAAATCACA   | 132257389-132257520 |
| -6659/-6514 | TCCTTCCAACTTCACGGCTTC | GCCAGTTAGCCCACAGGTGTTT | 132259602-132259747 |
| -7739/-7599 | TTCCTGCTGTTCCGTATTGA  | GCCAGTGCTCAGCCCTACTG   | 132260687-132260827 |
| -9722/-9566 | TGACCATGAAAGGGCTTGGA  | TCATTTTCACTTGACAGCTCTC | 132262654-132262810 |
